# Supplementary material
Source: PubMed Central journal article supplement (PMC5490755)
Supplement: jci-127-92167-s001.pdf [file jci-127-92167-s001.pdf]

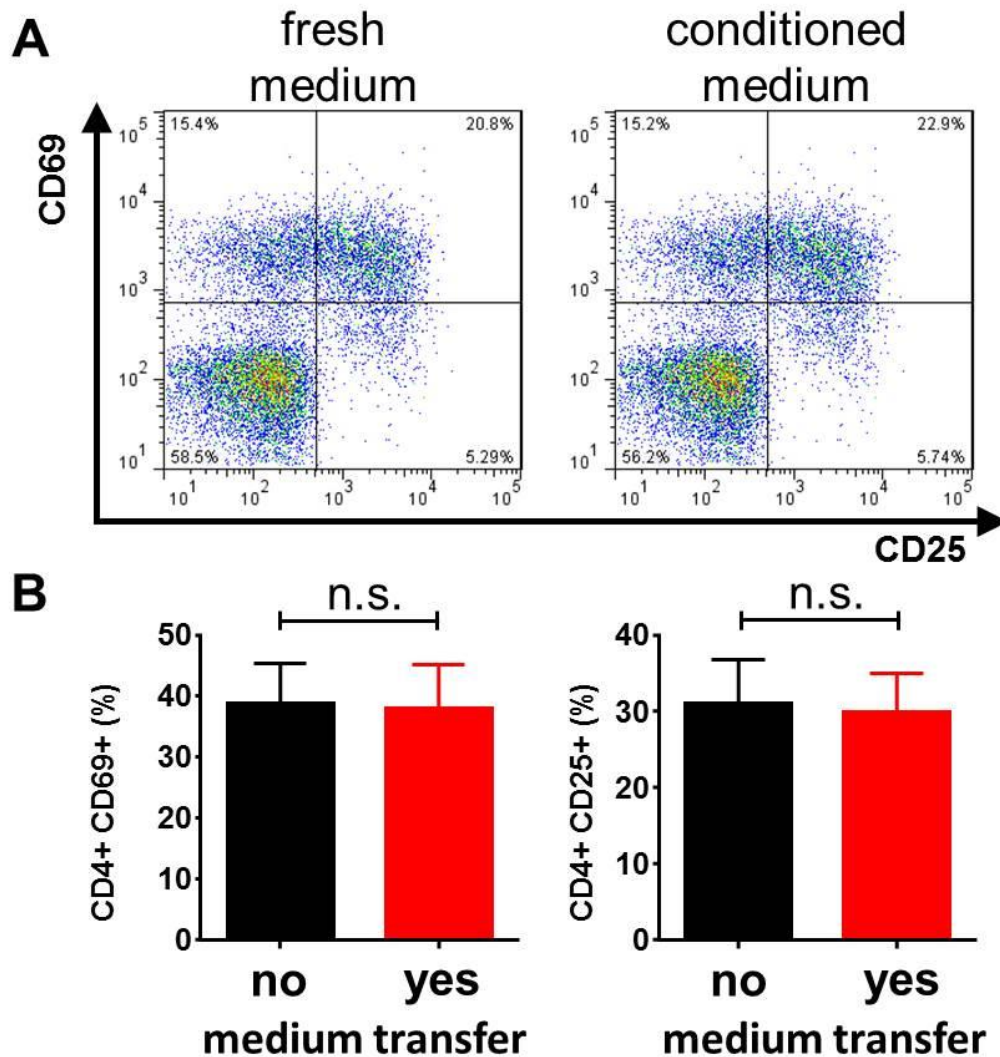

**Supplemental Figure. 1. Effect of medium conditioning by ML265-treated cells on T cell activation.** Macrophages from CAD patients were stimulated with LPS/IFN- $\gamma$  in the absence or presence of ML265. After 12 hrs, culture medium was replaced by fresh medium. After 24 hrs, culture medium was transferred to naïve CD4 T cells, which were activated with CD3/CD28-coated beads at a ratio of 1:4. After 48 hrs, the surface expression of CD25 and CD69 was measured by flow cytometry. **(A)** Representative flow cytometry dot plots. **(B)** Summary of 6 experiments. The data are shown as mean  $\pm$  SEM. n.s.; not significant. Paired 2-tailed Student's *t* test was used for comparisons.

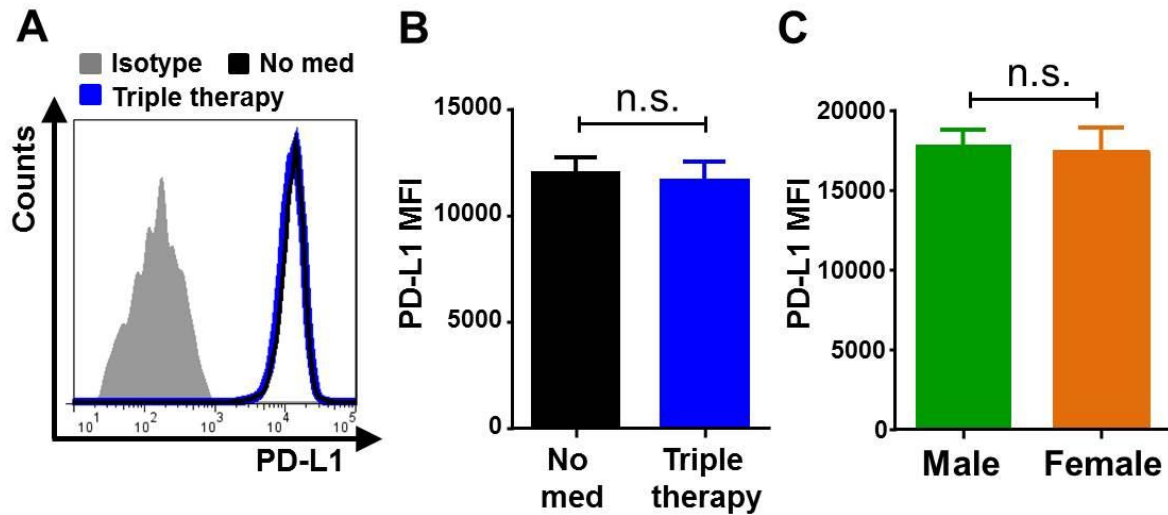

**Supplemental Figure 2. Influence of medication exposure and gender on PD-L1 expression.** **(A, B)** Macrophages were generated from individuals without CAD treated with triple therapy (aspirin, a statin, and an angiotensin-converting enzyme inhibitor). Individuals on no medication served as controls. Macrophages were stimulated with LPS/IFN- $\gamma$  and surface expression of PD-L1 was measured by flow cytometry after 24 hrs. **(A)** Representative histograms. **(B)** Mean fluorescence intensity (MFI) from n=10 experiments. **(C)** Macrophages were generated from 25 male CAD patients and 9 female CAD patients. Macrophages were stimulated with LPS/IFN- $\gamma$  and surface expression of PD-L1 was measured by flow cytometry after 24 hrs. All data are mean  $\pm$  SEM. n.s.; not significant. The Mann-Whitney test was used for comparisons.

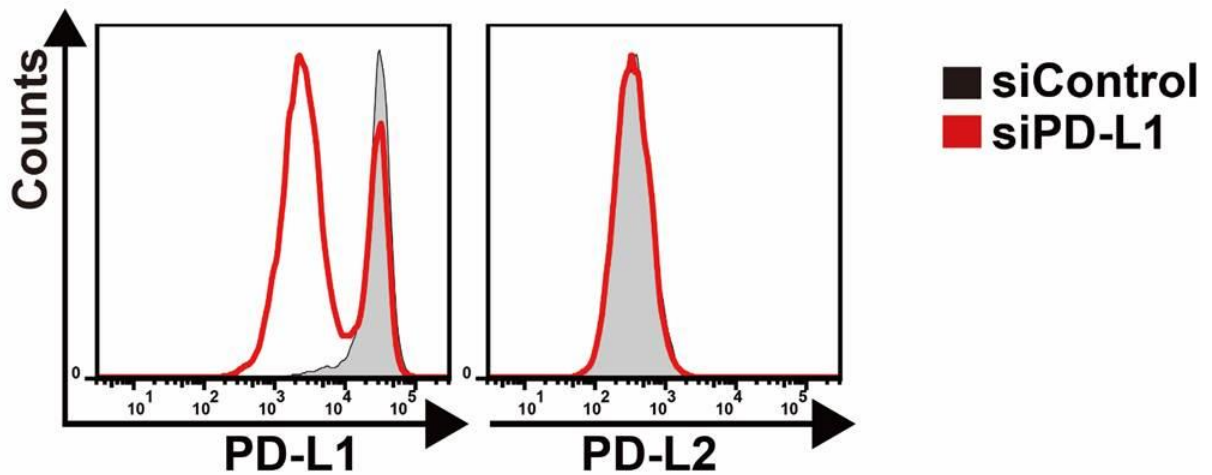

**Supplemental Figure 3. siRNA-knockdown of PD-L1.** Macrophages from CAD patients transfected with either siControl or siPD-L1 RNA for 48 hrs were stimulated with LPS/IFN- $\gamma$  for 24 hrs. The surface expression of PD-L1 and PD-L2 was measured by flow cytometry. Representative histograms are shown.

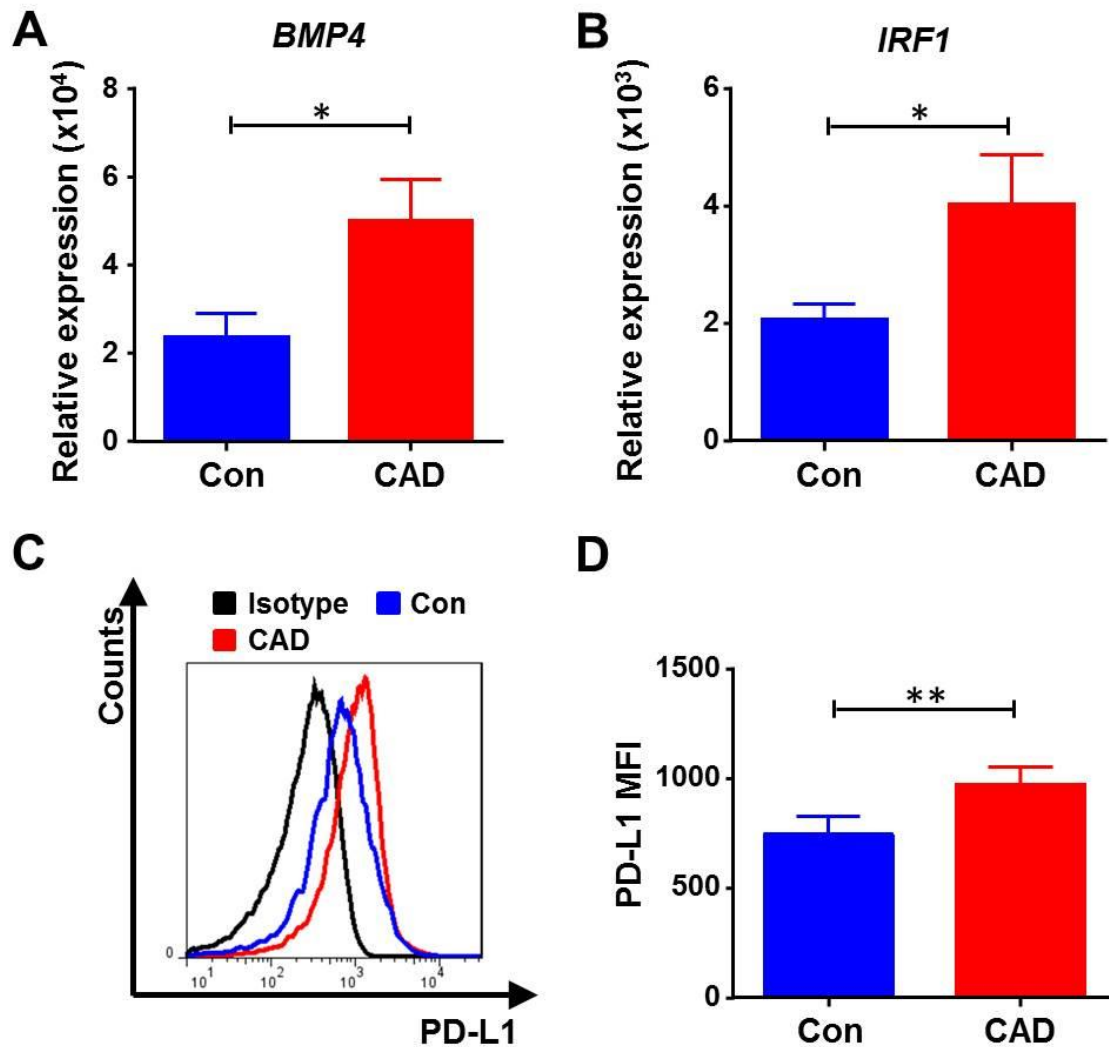

**Supplemental Figure 4. BMP4-IRF1-PD-L1 Upregulation in CAD Monocytes.**

CD14<sup>+</sup> monocytes from healthy individuals and CAD patients were isolated from freshly harvested peripheral blood. **(A)** Gene expressions of BMP4 were measured by RT-PCR. **(B)** Gene expressions of IRF1 were measured by RT-PCR. **(C, D)** Surface expression of PD-L1 was analyzed by flow cytometry. **(C)** Representative histograms of PD-L1 expression. **(D)** Mean  $\pm$  SEM of the PD-L1 MFI from 6 independent experiments. \* $P < 0.05$ ; \*\* $P < 0.01$ . The Mann-Whitney test was used for comparisons.

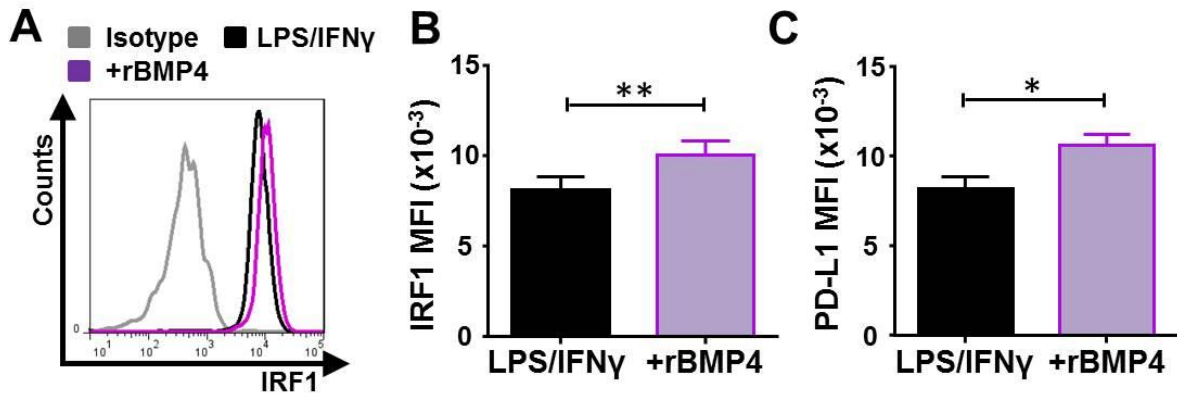

### Supplemental Figure 5. Recombinant BMP4 induces IRF1 and PD-L1.

Macrophages from healthy individuals were stimulated with LPS/IFN- $\gamma$  in the absence or presence of recombinant BMP4 (10 ng/ml) for 24 hrs. Intracellular IRF1 and surface expression of PD-L1 analyzed by flow cytometry. Data are from 6 experiments. All data are mean  $\pm$  SEM. \* $P$  < 0.05; \*\* $P$  < 0.01. Paired 2-tailed Student's  $t$  test was used for comparisons.

**Suppl. Table 1. Primers used in the manuscript**

| Genes          | Forward primers        | Reverse primers          |
|----------------|------------------------|--------------------------|
| PD-L1          | GGTTGTGGATCCAGTCACCT   | TTGGTGGTGGTGGTCTTACC     |
| PD-L2          | CAGTGCTATCTGAACCTGTGGT | CTGCAGGCCACCGAATTCTT     |
| CD80           | ATGGTGGGCACAGAAGTAGC   | AGGAAATCTGGGTTCTGGCG     |
| CD86           | TGGTCAGGGAGGGGTTTTGG   | GCCCCGGGTGATCTGTGTCT     |
| ICOSL          | GCAGCCTTCGAGCTGATACTC  | GTTTTCGACTCACTGGTTTGC    |
| OX40L          | CACCTACATCTGCCTGCACTTC | TTCGGTAAATTGTACTTTGATACT |
| BMP4           | ATGATTCCTGGTAACCGAATGC | CCCCGTCTCAGGTATCAAACCT   |
| IRF1           | CTGTGCGAGTGTACCGGATG   | ATCCCCACATGACTTCCTCTT    |
| $\beta$ -actin | GATCATTGCTCCTCCTGAGC   | CGTCATACTCCTGCTTGCTG     |
